1 **The maternal genetic history of the Angolan Namib Desert: a key region for**  
2 **understanding the peopling of southern Africa**

3

4 Sandra Oliveira<sup>1,2</sup>, Anne-Maria Fehn<sup>1,3,4</sup>, Teresa Aço<sup>5</sup>, Fernanda Lages<sup>6</sup>, Magdalena Gayà-Vidal<sup>1</sup>, Brigitte  
5 Pakendorf<sup>7</sup>, Mark Stoneking<sup>8</sup>, Jorge Rocha<sup>1,2,6</sup>

6

7 1. CIBIO/InBIO: Research Centre in Biodiversity and Genetic Resources, University of Porto, Portugal

8 2. Departamento de Biologia, Faculdade de Ciências, Universidade do Porto, Portugal

9 3. Department of Linguistic and Cultural Evolution, MPI for the Science of Human History, Jena, Germany

10 4. Institute for African Studies, Goethe University, Frankfurt, Germany

11 5. Centro de Estudos do Deserto (CEDO), Namibe, Angola

12 6. ISCED/Huíla—Instituto Superior de Ciências da Educação, Lubango, Angola

13 7. Laboratoire Dynamique du Langage, UMR5596, CNRS & Univ Lyon, Lyon, France

14 8. Department of Evolutionary Genetics, MPI for Evolutionary Anthropology, Leipzig, Germany

15

16 Corresponding author: Jorge Rocha

17 Email: [jrocha@cibio.up.pt](mailto:jrocha@cibio.up.pt)

18 **ABSTRACT**

19

20 Southern Angola is a poorly studied region, inhabited by populations that have been associated with different  
21 migratory movements into southern Africa. Besides the long-standing presence of indigenous Kx'a-speaking  
22 foragers and the more recent arrival of Bantu-speaking pastoralists, ethnographic and linguistic studies have  
23 suggested that other pre-Bantu communities were also present in the Namib desert, including peripatetic groups  
24 like the Kwepe (formerly Kwadi speakers), Twa and Kwisi. Here we evaluate previous peopling hypotheses by  
25 analyzing the relationships between seven groups from the Namib desert (Kuvale, Himba, Tjimba, Kwisi, Twa,  
26 Kwepe) and Kunene Province (!Xun), based on newly collected linguistic data and 295 complete mtDNA  
27 genomes. We found that: i) all groups from the Namib desert have genealogically-consistent matrilineal systems  
28 that had a strong impact on their maternal genetic structure by enhancing genetic drift and population  
29 differentiation; ii) the dominant pastoral groups represented by the Kuvale and Himba were part of a Bantu  
30 proto-population that also included the ancestors of present-day Damara and Herero peoples from Namibia; iii)  
31 Tjimba are closely related to the Himba; iv) the Kwepe, Twa and Kwisi have a divergent Bantu-related mtDNA  
32 profile and probably stem from a single population that does not show clear signs of being a pre-Bantu  
33 indigenous group. Taken together, our results suggest that the maternal genetic structure of the different groups  
34 from the Namib desert is largely derived from endogamous Bantu peoples, and that their social stratification and  
35 different subsistence patterns are not indicative of remnant groups, but reflect Bantu-internal variation and  
36 ethnogenesis.

## 37 INTRODUCTION

38

39 The high ethnic diversity of southwestern Angola, the importance of its pastoral culture, and the likely  
40 confluence of different migratory waves in its peopling provide a unique opportunity to explore the significance  
41 of different hypotheses about the population history of southern Africa. At present, it is generally accepted that  
42 the oldest population stratum in this vast region is represented by groups speaking languages that make  
43 extensive use of click consonants, which were previously lumped into a hypothetical “Khoisan” phylum  
44 (Greenberg 1963), but are now divided into three families: Kx’a, Tuu and Khoe-Kwadi (Güldemann and Fehn  
45 2014). While Tuu and Kx’a-speaking peoples were historically hunter-gatherers, Khoe-Kwadi languages are  
46 spoken by both foraging and food-producing groups, with the Khoekhoe-speaking Nama representing one of the  
47 major pastoralist populations of southern Africa. Based on typological observations, it has been speculated that  
48 the Khoe-Kwadi languages might constitute a later arrival in the area, possibly linked to a migration of Later  
49 Stone Age pastoralists from East Africa, who moved into regions previously inhabited by Kx’a and Tuu-  
50 speaking hunter-gatherers (Westphal 1963; Barnard 1992; Güldemann 2008). Although the presence in southern  
51 Africa of lactase persistence and Y-chromosome haplotypes that originated in eastern African pastoralists seems  
52 to support this hypothesis (Henn et al. 2008; Coelho et al. 2009; Breton et al. 2014; Macholdt et al. 2014), it is  
53 unclear whether these traits were dispersed by a massive immigration of Khoe-Kwadi speakers or were  
54 introduced through small scale movements leading to the diffusion of livestock and genetic variants across  
55 neighboring resident populations (Sadr 2015).

56 More recently, about 1,500 years ago, the human population landscape of southern Africa was further modified  
57 by the arrival of Bantu-speaking groups with subsistence economies that presently range from almost exclusive  
58 pastoralism to mixed farming systems (Russell et al. 2014). While the emergence of new combinations of genes,  
59 languages and modes of subsistence is an expected outcome of the confluence of different population strata, the  
60 prevailing views about the peopling of southern Africa favor the idea that the technological advantages and  
61 social dominance of the Bantu considerably restricted the direction and range of genetic and cultural exchange  
62 (Cashdan 1986). Consequently, a strong connection between foraging, low social status, the “Khoisan”  
63 languages and phenotypes including small stature and light skin was established, leaving anthropologists  
64 puzzled with foraging peoples physically more similar to other non-“Khoisan” African populations (Cashdan  
65 1986; Barnard 1992). In this context, the origin of the dark-skinned foragers speaking Khoe-Kwadi languages,  
66 such as the Khwe from the Okavango region, or the Damara from Namibia, is often considered enigmatic and  
67 has been linked to a hypothetical stratum of pre-Bantu non-“Khoisan” peoples (Cashdan 1986; Barnard 1992;  
68 Blench 2006). Intriguingly, the possibility of a historical link to the Bantu has only rarely been considered  
69 (Westphal 1963; Cashdan 1986).

70 Located at the southwestern edge of the Bantu expansion and at the northwestern fringe of an area traditionally  
71 inhabited by Kx’a-speaking hunter-gatherers, the Angolan Namib desert forms a contact zone that mirrors the  
72 high variability currently observed in the wider region of southern Africa (Fig. 1). The dominant populations are  
73 the Himba and Kuvale, two matrilineal pastoralist populations commonly considered to be part of the broad  
74 Herero ethno-linguistic division that arrived in the area during the Bantu expansions, but whose relationships to  
75 one another and to other southwestern African Bantu speakers are not clear (Westphal 1963; Gibson 1977;  
76 Coelho et al. 2009; Barbieri et al. 2014b). In the orbit of these two groups gravitate several small-scale

77 communities, including the Tjimba, the Kwepe, the Kwisi and the Twa, who share physical similarities and a  
78 matriclanic social organization with their Bantu neighbors, but whose origins remain unknown. Due to their  
79 patron-client relationship with the Himba and Kuvale, they are perhaps best described as peripatetic peoples  
80 (Bollig 2004), a category that encompasses small-scale, low-status, endogamous communities that are primarily  
81 non-food producing and provide specialized goods and services (e.g., as blacksmiths, healers, sorcerers) to their  
82 dominant neighbors. However, previous hypotheses about the history of the area, based on anthropological and  
83 linguistic data, suggest that these peripatetic communities are associated with very different migratory  
84 movements. The Kwisi and the Twa, who speak the Bantu language Kuvale, claim to be the native peoples of  
85 the Angolan Namib and have been considered remnants of the same set of pre-Bantu foraging populations to  
86 which the Damara were also ascribed (Almeida 1965; Estermann 1976). Their original language would have  
87 been lost after contact with the Bantu, similar to what has been claimed for the Pygmies of West and Central  
88 Africa (Güldemann 2008; Bahuchet 2012). The Kwepe are small stock breeders who until recently spoke  
89 Kwadi, a language that has been replaced by Kuvale and is now virtually extinct (Westphal 1963; Almeida  
90 1965). Their linguistic heritage led to the proposal that they might represent a remnant group from the  
91 hypothetical Khoe-Kwadi migration introducing pastoralism to southern Africa (Güldemann 2008). Finally, the  
92 Tjimba are often considered Himba who lost their cattle but retained their language and other aspects of their  
93 culture (Warmelo 1951). Still, it has been suggested that some isolated Tjimba communities from Namibia  
94 might be connected to a more ancient foraging tradition (MacCalman and Grobbelaar 1965).

95 All of these hypotheses entail a set of testable expectations about the genetic, linguistic and cultural  
96 relationships of the peoples living in the Angolan Namib. Specifically, from a genetic perspective it is expected  
97 that: i) the Kuvale and the Himba are related to each other as well as to other Herero-speaking peoples of  
98 southern Africa; ii) the Twa and the Kwisi are genetically similar to each other, but clearly distinct from their  
99 Bantu neighbors; iii) the Kwepe share genetic similarities with Khoe-speaking peoples from other regions of  
100 southern Africa; and iv) the Tjimba are either closely related to the Himba or have a very distinct genetic  
101 composition presumably related to the Twa and Kwisi. In this scenario, it is also expected that the matrilineal  
102 descent-group systems of the peripatetic peoples are relatively recent and were borrowed from their Himba and  
103 Kuvale neighbors, considering that matrilineality is known to be a distinctive feature of Bantu societies in  
104 southwestern Africa (Estermann 1952; Gibson 1956; Bollig 2006).

105 To date, the remote geographical location and high mobility status of the peripatetic peoples of the Angolan  
106 Namib have made it difficult to evaluate these predictions. Recently, in the course of field research being  
107 conducted in the area, we have located and contacted several communities belonging to the Twa, Kwisi, Kwepe  
108 and Tjimba ethnic groups who live in close proximity to the Kuvale and Himba populations. Here, we report for  
109 the first time a multidisciplinary assessment of the relationships between these populations based on newly  
110 collected linguistic data and 295 complete mtDNA genomes. Our results suggest that the maternal genetic  
111 structure of the different ethnic groups dwelling in the Namib Desert is largely derived from endogamous Bantu  
112 peoples and was strongly shaped by their matriclanic social organization, with contributions of non-Bantu  
113 populations being mostly restricted to “Khoisan” lineages. In this context, we propose that the social  
114 stratification and different subsistence patterns found in the area are not indicative of remnant groups, but reflect  
115 Bantu-internal variation and ethnogenesis.

116

## 117 MATERIALS AND METHODS

118

### 119 Samples

120

121 We analyzed 295 whole mitochondrial genomes from six populations living in the Namib desert (77 Himba; 85  
122 Kuvale; 37 Kwepe, 24 Kwisi; 18 Twa; 15 Tjimba) and from 39 Kx'a-speaking !Xun hunter-gatherers from the  
123 Kunene Province (Fig. 1; Table S1). At all sampling locations, the purpose of the study was explained with the  
124 aid of bilingual native speakers. For each participant, we collected a saliva sample and information about  
125 language, matriclan and place of birth, up to the grandparental generation. With the exception of the !Xun, who  
126 do not have a clanic system, all sampled individuals identified as members of one out of 13 distinctive  
127 matriclans. Additional genealogical information, including relatedness with other donors, was also recorded.  
128 Given the intrinsic social structure of these highly endogamous groups, we only avoided including siblings and  
129 mother-offspring pairs in the final dataset (see Pinto et al. 2016 for details). The linguistic analyses were based  
130 on lexical data collected from individuals belonging to each sampled group, including two elder community  
131 members of the Kwepe community, who still remember Kwadi (see Pinto et al. 2016). As previously described  
132 (Pinto et al. 2016), the saliva samples, as well as the linguistic and the personal information, were collected with  
133 the donors' written informed consent in the framework of a collaboration between the Portuguese-Angolan  
134 TwinLab established between CIBIO/InBio and ISCED/Huíla Angola, with the ethical clearance of ISCED and  
135 the CIBIO/InBIO-University of Porto boards, and the support and permission of the Provincial Governments of  
136 Namibe and Kunene.

137

### 138 mtDNA sequencing

139

140 Multiplexed sequencing libraries were produced from genomic DNA and enriched for mtDNA sequences  
141 following Meyer and Kircher (2010) and Maricic et al. (2010) with some modifications as detailed in Barbieri et  
142 al. (2012). The sequencing was performed on the Illumina Miseq platform with paired-end runs of 214 or 314  
143 cycles. Base calling was performed with Bustard, adapters trimmed with leeHom (Renaud et al. 2014) and reads  
144 demultiplexed using deML (Renaud et al. 2015). The reads were aligned against the human reference genome  
145 19 using a customized version of BWA v0.5.10-evan (<https://bitbucket.org/ustenzel/network-aware-bwa>; Li and  
146 Durbin 2009). Reads that aligned to the mitochondrial genome and known nuclear insertions of mitochondrial  
147 DNA (numts) (Li et al. 2012) were re-aligned to the mtDNA revised Cambridge Reference Sequence (Andrews  
148 et al. 1999) using BowTie2 (Langmead and Salzberg 2012), and the consensus sequences were called using an  
149 in-house script for detecting mtDNA heteroplasmies (Li and Stoneking 2012). The resulting mitochondrial  
150 genomes have a mean coverage of 400x. Missing nucleotides were replaced with the nucleotide that was present  
151 in all otherwise identical haplotypes of the dataset. With this imputation approach the missing data of the whole  
152 dataset (1057 missing nucleotides distributed across 10 samples) was reduced to 3 missing sites in a single  
153 sample. The Haplogrep webtool and Phylotree Build 16 were used to assign the haplogroup of each sample  
154 (Oven and Kayser 2008; Kloss-Brandstätter et al. 2011). Sequence alignments were performed with MUSCLE  
155 v.3.8 (Edgar 2004). The two poly-C regions (np 303-315, 16183-16194) were removed in all further analyses.  
156 Sequences are available from GenBank with accession numbers XXXXXXXX – XXXXXXXX.

## 157 Genetic data analysis

158

159 Analyses of Molecular Variance (AMOVA), pairwise  $\Phi_{st}$  values and genetic diversity indices were computed in  
160 Arlequin v3.5.2.2 (Excoffier and Lischer 2010). Non-metric multidimensional scaling (MDS) and k-means  
161 analyses based on pairwise  $\Phi_{st}$  distance matrices were carried out in R, using the functions “isoMDS” from the  
162 package MASS (Venables and Ripley 2002) and “kmeans” with several random starts (Hartigan and Wong  
163 1979), respectively. An additional matrix describing the relationships between populations solely on the basis of  
164 matriclan frequencies was generated in Arlequin v3.5.2.2 using a  $F_{st}$ -like distance treating different clans as  
165 alleles from a single locus. The correlation between genetic and clanic distances was assessed by performing a  
166 Mantel test with 1000 permutations of matrix elements to determine significance. Neighbor-Joining trees were  
167 generated using the R function “nj” from the package “ape” (Paradis et al. 2004).

168 Median-joining networks (Bandelt et al. 1999) were computed with Network 5.0 ([www.fluxus-engineering.com](http://www.fluxus-engineering.com))  
169 and customized in Network Publisher v2.1.1.2. The time to the most recent common ancestor (TMRCA) of  
170 subhaplogroups was estimated with Network from the *rho* statistic (Forster et al. 1996), using a mutation rate of  
171  $1.665 \times 10^{-8}$  substitutions per nucleotide per year (Soares et al. 2009). The root defining the ancestral haplotype  
172 in each subhaplogroup was identified by using the full mtDNA network.

173 For population-based and sequence-based comparisons, we compiled a dataset comprising approximately 2,500  
174 previously-published whole mitochondrial genomes from different regions of Africa (Table S2).

175 Probabilities of alternative evolutionary models were computed by using an Approximate Bayesian  
176 Computation (ABC) approach (Beaumont et al. 2002). For each model, two million datasets of complete  
177 mtDNA genomes were simulated assuming a mutation rate of  $1.665 \times 10^{-8}$  substitutions/nucleotide/year (Soares  
178 et al. 2009), a transition bias matching the ratio observed in the empirical data, and a generation time of 28 years  
179 (Fenner 2005). Simulations were performed with fastsimcoal v2.5.2.1.1 (Excoffier et al. 2013) and summary  
180 statistics computed with Arlequin v3.5.2.2 (Excoffier and Lischer 2010), both within the framework of  
181 ABCtoolbox (Wegmann et al. 2010). The summary statistics used for comparing the observed and simulated  
182 data were the number of haplotypes (k), sequence diversity (H), number of segregating sites (S), number of  
183 private segregating sites (prS), Tajima's D (D) and mean number of pairwise differences (MPD), all computed  
184 within populations. In addition, population pairwise  $\Phi_{st}$  and pairwise MPD was computed between pairs of  
185 populations. All summary statistics were standardized.

186 The ABC estimations were performed with a general linear model (GLM) regression adjustment (Leuenberger  
187 and Wegmann 2010; Wegmann et al. 2010) applied to the 10,000 retained simulations (0.5%) closest to the  
188 observed data. Model selection was based on posterior probabilities estimated using the marginal density of  
189 each model relative to the density of all models. The power to correctly select a given model was assessed by  
190 using 1,000 pseudo-observed datasets taken from that model and calculating the number of times it had the  
191 highest posterior probability when compared with alternative models (Veeramah et al. 2012). To reduce the  
192 effects of including summary statistics that are redundant or do not capture the main features of the data, we  
193 additionally performed model selection using a subset of summary statistics that were only moderately  
194 correlated (Pearson's  $r^2 < 0.8$ ) and exhibited the highest power to discriminate between models, as proposed by  
195 de Filippo et al. (2016) (Table S3).



196 To estimate parameters from the most supported model, we transformed summary statistics from simulated and  
197 observed data into partial least squares (PLS) using the R scripts provided in ABCtoolbox (Wegmann et al.  
198 2009, 2010). The smallest set of PLS components with the largest amount of information about the model  
199 parameters was selected by using Root Mean Square Error (RMSE) plots (Wegmann et al. 2009). The estimation  
200 was then performed as described above and the posterior distributions of individual parameters were checked for  
201 bias. We randomly selected 1,000 pseudo-observed datasets generated with known parameter values to  
202 determine the coverage of the posteriors (the proportion of times a true parameter value is present in a given  
203 credible interval) (Wegmann et al. 2009; Wegmann and Excoffier 2010). A Kolmogorov-Smirnov test was  
204 applied (with Bonferroni correction) to assess the uniformity of the posterior quantiles. To determine the power  
205 of parameter estimation, we computed the coefficient of variation  $R^2$  by regressing the PLS components against  
206 each model parameter (Neuenschwander et al. 2008). To evaluate the accuracy of the mode as a point estimate,  
207 we calculated the  $RMSE_{mode}$  for each parameter based on 1,000 pseudo-observed datasets (Wegmann and  
208 Excoffier 2010). Pairs of PLS components from the retained simulations were plotted together with the  
209 transformed observed data in order to check how well the retained simulations fit the observed data.

210

### 211 **Linguistic data analysis**

212

213 We collected data from southwestern Bantu languages of southwestern Angola, as well as comparative samples  
214 from Kwadi (as remembered by two Kwepe elders) and the !Xun variety of the Kunene Province. The linguistic  
215 data from Bantu are based on a 600-item wordlist that is a subset of the Summer Institute of Linguistics (SIL)  
216 Comparative African Wordlist (Snider and Roberts 2006) and was supplemented by comparative material from  
217 Namibian Herero (Möhlig and Kavari 2008), and several varieties belonging to the Nyaneka-Nkhumbi cluster  
218 (Humbe, Muhila, Nyaneka, Ngambwe, Handa) (unpublished data from Jordan and Manuel I 2013; Jordan  
219 2015).

220 Following an analysis of regular sound correspondences, we established 693 cognate sets based on 273  
221 meanings, which include the Swadesh 200 (Swadesh 1952) and Leipzig-Jakarta wordlists (Haspelmath and  
222 Tadmor 2009), minus function words, personal pronouns, and question words. For computational purposes, we  
223 coded languages for presence (1) or absence (0) of a particular lexical root. As our data from Himba and Tjimba  
224 displayed a high degree of linguistic homogeneity, they were combined and treated under the label “Himba”.  
225 Based on our coded dataset, we generated a matrix of linguistic distances (1 minus the percentage of cognate  
226 sharing) and computed a Neighbor-Joining tree using the R package “ape”, as described above. Linguistic  
227 distances were compared with genetic distances with a Mantel test, as described above.

228 We further used a Bayesian phylogenetic approach as implemented in the BEAST2 framework (Bouckaert et al.  
229 2014) and tested three models included in the Babel package (Bouckaert R 2016): (1) Continuous Time Markov  
230 Chain (CTMC); (cf. Greenhill and Gray, 2009); (2) Covarion (Penny et al. 2001; Atkinson et al. 2008); (3) Dollo  
231 (Nicholls and Gray 2006). We ran an analysis for each model, with a chain length of 10,000,000, sampling every  
232 1000 steps. The first 100,000 steps were discarded as burn-in.

233 To evaluate the performance of these models with our dataset, we used the Tracer software (Rambaut and  
234 Drummond 2007) to compare the Akaike Information Criteria through Markov chain Monte Carlo (AICM) of  
235 each analysis, where lower AICM values indicate better model fit (Baele et al. 2013). We found that the model

236 displaying the best fit for our data was Covarion (AICM = 7116), outranking both CTMC (AICM = 7146) and  
237 Dollo (AICM = 7682).

238 The output of the analysis was visualized in DensiTree (Bouckaert 2010) in order to display reticulations and  
239 conflicting signals.

240

## 241 RESULTS

242

### 243 Genetic and matriclanic diversity in the Angolan Namib

244

245 By performing an analysis of molecular variance, we found that 25.2% of the total genetic variation in our  
246 sample is due to differences between populations. This level of genetic differentiation is 20.2% even when the !  
247 Xun are removed and is higher than previously observed among Bantu (5.5%; Barbieri, et al. 2014b) and  
248 “Khoisan” populations (16.6%; Barbieri, et al. 2014a). The levels of intra-population diversity are highest in the  
249 Kuvale and Himba (mean value of haplotype diversity, 0.95) and lowest in in the Kwepe (0.67), who display  
250 only five different haplotypes (Table S1).

251 A non-metric multidimensional scaling plot (MDS) based on pairwise  $\Phi_{st}$  distances reveals three main vertices  
252 of divergence (Fig. 2a): i) the !Xun from Kunene Province, who have high frequencies (97%; Table S4) of  
253 haplogroups L0d and L0k that typically predominate in most “Khoisan” populations from southern Africa  
254 (Barbieri et al. 2014a); ii) the Tjimba and Himba, whose close genetic relationship supports the view that the  
255 two groups are merely distinguished by their socio-economic status (Warmelo 1951; Vashro and Cashdan  
256 2015); iii) the Kwisi and Twa, whose genetic proximity is consistent with previous claims that these  
257 communities represent northern and southern branches of the same ethnic group respectively (Estermann 1976).

258 The differences in the mtDNA composition of the Namib peoples are mainly due to the uneven distribution of  
259 nine common subhaplogroups that collectively account for 90% of their observed variation, each with a small  
260 number of haplotypes rarely exhibiting more than 5 pairwise differences (Figs. 2b and 3; Table S4): L0a1b1,  
261 L0a1b2, L0a2a1b and L1c1b are very common in the Kwisi and Twa; L3e1a2 and L3d3a1a predominate in the  
262 Himba and Tjimba, while L0d1a1b1a and L0d1b1b are very frequent in the Kuvale, placing them closer to the !  
263 Xun (Fig. 2a). With the exception of the Kwisi, L3f1b4a is found at relatively high frequencies in most groups.

264 An assessment of lineage sharing among different populations shows that the most common subhaplogroups  
265 among the Himba/Tjimba and Kuvale (Fig. S1) are rarely found in other groups, except for one single L3f1b4a  
266 haplotype that is very frequent in the Kwepe but is likely to have originated in the Himba, who display a higher  
267 L3f1b4a diversity (Fig. S1). Conversely, haplotypes belonging to subhaplogroups that are frequent and diverse  
268 in the Kwisi, the Twa or the Kwepe can be found at moderate frequencies in the Himba and Kuvale (Fig. S1),  
269 suggesting that gene flow occurs preferentially from these peripatetic communities into the dominant groups.

270 The nine most common subhaplogroups are associated with all 13 matriclans identified during our survey, with  
271 the number of clans in each subhaplogroup varying from one to five (Fig. 3). The occurrence of several clans in  
272 the same subhaplogroup has several potential explanations, including adoption, patrilineal transmission, or  
273 chance. However, this pattern can also be explained by a well documented Herero custom of splitting the same  
274 line of descent into different clans, forming clan-groups with a claimed common ancestor designated as  
275 phratries (Gibson 1956; Viveló 1977). Interestingly, we found that three pairs of clans that were reported to us



276 has sharing a distant ancestor were also associated with the same subhaplogroup: Mukwalukune / Mukwatjiti  
277 (L0d1a1b1a); Mukwanambula / Mukwangombe (L0d1b1b and also L0a2a1b) and Mukwandjata / Mukwambua  
278 (L3f1b4a).

279 While most clans are distributed across multiple populations (Fig. 4a), we found several cases where the same  
280 clan is associated with different subhaplogroups in different populations (Fig. S2b, e, g, h, k), suggesting that  
281 clan sharing is not always due to migration. All these cases involve at least one common subhaplogroup from a  
282 dominant population (Kuvale or Himba), and one common subhaplogroup from the Twa, Kwisi and Kwepe  
283 peripatetics.

284 The absence of a one-to-one correspondence between matrilineal and subhaplogroups decreases the association  
285 between the distribution of matrilineal and the genetic differentiation among populations (Fig. 4b): in some  
286 cases, subhaplogroups that are associated with the same matrilineal predominate in populations that are  
287 genetically very divergent; in others, subhaplogroups that are shared across genetically similar populations are  
288 associated with different matrilineal. Consequently, distance matrices between populations based on matrilineal  
289 and mtDNA are clearly uncorrelated (Mantel test  $p = 0.57$ ; Fig. 4b).

290 In spite of these exceptions, we found that as much as 51% of the total mtDNA variation reflects differences  
291 between matrilineal, a highly significant value (AMOVA;  $p < 0.00001$ ) that is more than two times greater than  
292 the 20.2% proportion calculated among ethnic groups, indicating that there are remarkable differences in the  
293 mtDNA sequence profiles of individual matrilineal (Table S5).

294 Moreover, as shown in Figure 5a, the distributions of pairwise differences clearly indicate that mtDNA  
295 sequences drawn from the same clan have a significantly higher average probability of being closely related ( $\leq$   
296 5 pairwise differences) than two sequences randomly sampled from the whole Namib pool (0.53 vs. 0.10;  $p <$   
297 0.001, Fisher exact test), or from the same population (0.53 vs. 0.18;  $p < 0.001$ ), indicating that individuals from  
298 the same clan are more likely to share a subhaplogroup. This association becomes even stronger when mtDNA  
299 sequences are sampled in the same clan and the same population (0.53 vs. 0.63;  $p < 0.001$ ).

300 The probability of sampling related sequences within clans is significantly elevated in all populations (Fig. 5b;  $p$   
301  $< 0.001$  in all comparisons), and is remarkably high in the Kwepe, Twa and Kwisi, who display greater levels of  
302 within-clan sequence similarity than the Tjimba, Himba and Kuvale.

303 To rule out the possibility that close kin relationships could have inflated the likelihood that individuals from the  
304 same clan have exactly the same haplotype, we restricted the analysis to closely-related but non-identical  
305 haplotypes. We randomized one million times the matrilineal labels on observed matrilineal/haplotype pairs and  
306 then calculated the probability of finding within the same matrilineal two haplotypes with 1 to 5 differences (Fig.  
307 S3). As shown in Table S6, in most groups the observed value for this probability is too high to be obtained by  
308 chance, indicating that similar (but non-identical) haplotypes have a high probability of sharing clans by  
309 inheritance. The only non-significant values were found among the Kwepe and the Tjimba, whose low levels of  
310 within haplogroup diversity reduce the power of the test (Fig. 2b; Fig. S1). Note that by using this approach we  
311 made the conservative assumption that all individuals within the same matrilineal/haplotype pair share a common  
312 ancestor, which drastically reduces the number of independent matrilineal assignments that are needed to  
313 randomly match the observed data (Fig. S3).

314 Table S7 presents the estimates of the times to the most recent common ancestors (TMRCA) of the nine  
315 predominant subhaplogroups obtained with the *rho* statistic (Forster et al. 1996). Due to the association between

316 clans and subhaplogroups exhibited by most populations, these TMRCA can be used as proxies for the  
317 coalescent ages of the oldest clans in each clan-group. However, it is not possible to provide separate estimates  
318 for matrilineal clans associated with the same subhaplogroup, since these clans often share the TMRCA of the whole  
319 subhaplogroup and represent different samples from the same genealogy (Fig. 3). The TMRCA estimates range  
320 from ~560 to ~3,140 years (average ~1800 years) with large standard deviations.

321

## 322 **Relationships with other populations**

323

324 When the genetic profiles of the populations from Namib are compared with an extended mitochondrial  
325 genome-dataset including other groups from Angola (Nyaneka-Nkhumbi, Ovimbundu, Ganguela) and the wider  
326 region of southern Africa (Fig. 6), the Kwisi and the Twa remain outliers, while the Tjimba and Himba fall close  
327 to the Herero, Himba and Damara from Namibia (see also Soodyall and Jenkins 1993; Barbieri et al. 2014a;  
328 Barbieri et al. 2014b). The Kuvale, in contrast, are more similar to other populations with high levels of  
329 maternal Bantu-“Khoisan” admixture, including the Tshua, Shua, TcireTcire and ||Ani. The Kwepe are not close  
330 to any Khoe-speaking group, even though they spoke the related Kwadi language until recently (Almeida 1965;  
331 Pinto et al. 2016). The !Xun from the Angolan Kunene Province are related to Kx’a- and Tuu-speaking groups  
332 from Namibia and Botswana.

333 These patterns are confirmed and complemented by the clustering results obtained with the k-means algorithm  
334 (Fig. S4). With the exception of the Kuvale, all the populations from Namib are initially lumped into a cluster  
335 encompassing most Bantu-speaking peoples (k=2 in red). Further partitions: i) isolate a homogeneous group of  
336 Bantu-speaking populations that forms a central core in the MDS plot (k=4 in green); ii) separate the Twa and  
337 Kwisi from the other clusters (k=6 in yellow); and iii) group the Angolan Himba with the Herero, Himba and  
338 Damara from Namibia (k=7 in orange). An outstanding feature of the k-means partitions is the wide dispersal  
339 across different clusters of the Khoe-Kwadi-speaking populations represented in our dataset. Some groups from  
340 the Central Kalahari (Glui, Gllana and Naro) and Namibia (Nama and Haiilom) cluster together with Kx’a- and  
341 Tuu-speaking “Khoisan” peoples (k=2-7). Groups from the eastern Kalahari (Tshwa, TcireTcire) and Okavango  
342 (||Ani and Buga) form a cluster with high levels of maternal Bantu/“Khoisan” admixture together with the  
343 Bantu-speaking Kuvale, Tswana and Kgalagadi (k=3-7). Finally, the Damara, the ||Xokhoe and the Kwepe  
344 (formerly speaking Kwadi), in spite of their high levels of genetic differentiation, are grouped together with  
345 Bantu-speaking populations that have low amounts of “Khoisan” admixture (k=2-7).

346 The phylogeographic analysis of the mtDNA lineages from the Namib populations provides additional  
347 information about their relationships with groups from adjacent areas (Fig. S5). Subhaplogroups L1c1b and  
348 L0a1b2, are remarkable for their molecular divergence and geographical confinement to southwestern Angola  
349 (Fig. S5c, i). Other major subhaplogroups have molecularly close neighbors in several Bantu-speaking  
350 populations from southern Africa (L0a2a1b and L3f1b4a; Fig. S5d, l) or are related to sequences that are mostly  
351 shared by Bantu and Khoe-Kwadi groups from the area (L0a1b1, L3d3a1 and L3e1a2; Fig. S5b, j, k). None of  
352 the L0d lineages common in the Kuvale (L0d1a1b1a and L0d1b1b) were found in the !Xun from Angola, the  
353 nearest “Khoisan” group from the Namib desert. Instead, their L0d1a1b1a haplotypes, also observed in the  
354 Himba from Namibia, are close to lineages that were found in the Khoe-Kwadi-speaking Shua from Botswana,  
355 while the L0d1b1b haplotypes are remotely related to sequences observed in the Damara from Namibia and the

356 Luyana from Zambia (Fig. S5e, f). The most common subhaplogroups in the !Xun (L0d1c1a1a, 26% and  
357 L0d2a1a, 36%) have unique haplotype matches with !Xun and Ju|'hoan from northern Namibia and display  
358 sequences that are closely related to “Khoisan” groups from southern Africa (Fig. S5g, h). Taken together, these  
359 results indicate that, with two exceptions (L1c1b and L0a1b2), most sequences from southwestern Angola are  
360 nested in the phylogeographic pattern that emerged from the contact of previously identified population strata  
361 from southern Africa.

362

### 363 **Testing relationships of Kuvale and Herero/Himba/Damara**

364

365 As previously noted (Barbieri et al. 2014b), the close proximity of the Himba and Herero pastoralists to the  
366 Damara, who speak the same Khoe language as the Nama and have a peripatetic lifestyle, stands in stark  
367 contrast to their genetic distinctiveness from the linguistically and culturally similar Kuvale. Based on  
368 resampling tests, Barbieri et al. (2014) suggested that the sharing of a common ancestry by the Herero, Himba  
369 and Kuvale was not compatible with a scenario of shared ancestry between the Herero, Himba and Damara.  
370 Here, we address this question by lumping the closely related Herero, Himba and Damara (all clustered by k-  
371 means at k=7; Fig. S4) into a single metapopulation (HHD) and testing three evolutionary scenarios relating this  
372 metapopulation with the Kuvale and two neighboring populations (Nyaneka-Nkhumbi and !Xun), using an  
373 Approximate Bayesian Computation (ABC) approach (Beaumont et al. 2002). The !Xun-speaking “Khoisan”  
374 from Angola were always used as an outgroup and we assumed that their split predated all other events (Fig. 7).  
375 The Nyaneka-Nkhumbi provide a southwestern Bantu-speaking reference population located to the northeast of  
376 the Namib desert (Fig. 6b). In the first scenario, an early divergence of the Kuvale is followed by a more recent  
377 split between the Nyaneka-Nkhumbi and the HHD metapopulation (Fig. 7, Model A). The second scenario  
378 postulates a recent common origin of the Kuvale and HHD (Fig. 7, Model B). The third scenario assumes that  
379 the most recent common origin is between the Kuvale and the Nyaneka-Nkhumbi (Fig. 7, Model C).  
380 Asymmetric migration was allowed between all pairs of populations. Priors for splitting times (T), effective  
381 population sizes ( $N_e$ ) and migration rates (m) are shown in Table S8. The power to predict the correct model  
382 was 0.47, 0.48 and 0.44, in simulated models A, B, and C, respectively. These values are significantly different  
383 from the expected 0.33 if there was no discriminatory power ( $p < 0.001$ , binomial test).

384 Model B, assuming a recent common origin of the Kuvale and HHD, was the most supported scenario, with a  
385 posterior probability of 0.74 (Fig. 7, Model B). By iteratively excluding summary statistics that were highly  
386 correlated (Pearson's  $r^2 > 0.8$ ), starting with those which had less power to discriminate between models (de  
387 Filippo et al. 2016), we found that model B was still the most supported model.

388 We additionally used the ABC framework to estimate the demographic parameters of the best supported  
389 scenario based on 2 million simulations (Fig. 7, Model B; Table S8; Fig. S6). Assuming a generation time of 28  
390 years (Fenner 2005), our estimate for the time of split of the !Xun (T3; ~170 kya; 95% CI: 34-223 kya) is  
391 consistent with previous calculations of the divergence time of “Khoisan” peoples from other sub-Saharan  
392 African populations (Behar et al. 2008; Schlebusch et al. 2012; Veeramah et al. 2012). The proposed time of  
393 split between the Kuvale and HHD (T1) is quite recent (0.662 kya; 95% CI: 0.001-12.16 kya), while the date of  
394 divergence of the Nyaneka-Nkhumbi (T2; 4.35 kya; 95% CI: 0.783-13.47 kya) is probably overestimated, given

395 the available archeological evidence for the arrival of Bantu peoples in southern Africa of only about 1.5 kya  
396 (Russell et al. 2014).

397 Our estimates of  $N_e$  show that the Nyaneka-Nkhumbi have the largest effective population size ( $\sim 17,000$ ; 95%  
398 CI: 2,378-100,000), followed by the HHD, the Kuvale and the !Xun, with estimates of  $\sim 1,600$  (95% CI: 276-  
399 66,741),  $\sim 900$  (95% CI: 200-40,073) and  $\sim 500$ , respectively (95% CI: 200-2,975) (Fig. 7; Table S8). The point  
400 estimates of ancestral effective population sizes ( $N_{A1}$  and  $N_{A2}$ ) suggest that the Nyaneka-Nkhumbi  
401 experienced a  $\sim 3$ -fold growth after their split ( $N_{A2} = 6,000$  to  $N_{A1} = 17,000$ ), while the size  
402 of the ancestors of the Kuvale and HHD underwent a  $\sim 10$ -fold reduction ( $N_{A2} = 6,000$  to  $N_{A1} = 600$ ) (Fig. 7;  
403 Table S8).

404 The migration estimates, expressed either as the proportion of immigrants in a population per generation ( $m$ ) or  
405 the absolute number of immigrants per generation ( $Nm$ ), show that the amount of gene flow into the !Xun is  
406 negligible (Table S8), in agreement with their genetic proximity to other “Khoisan” groups and their pronounced  
407 divergence from the HHD and Kuvale (Fig. 6a). Elevated migration rates from the !Xun into the Kuvale ( $m =$   
408  $0.021$ ;  $Nm = 18.9$  migrants/generation), are in accordance with the high amount of characteristic L0d haplotypes  
409 that was found in this population (Figs. 2 and 7; Table S8). However, this result should be interpreted with  
410 caution since most L0d lineages in the Kuvale belong to two subhaplogroups that are likely to be derived from  
411 only two ancestral women (Table S4; Fig. S1), and probably were not transferred by the continuous gene flow  
412 process simulated in our ABC analysis. We additionally estimated high migration rates from the !Xun to the  
413 common ancestor of the Kuvale and HHD ( $m = 0.010$ ,  $Nm = 5.7$ ), from the Kuvale to HHD ( $m = 0.015$ ;  $Nm =$   
414  $24.5$ ), and to a lesser extent from the HHD to the Kuvale ( $m = 0.005$ ,  $Nm = 4.2$ ) (Fig. 7).

415

#### 416 **Linguistic analyses**

417

418 The high amount of genetic divergence among the Namib peoples (Fig. 2a) contrasts with the relative linguistic  
419 homogeneity of the area, where all groups presently speak either Himba or Kuvale. While the classification of  
420 Himba as a variety of the Herero language is fairly straightforward and widely accepted, the position of Kuvale  
421 is less clear (Westphal 1963; Vansina 2004; Maho 2009). Moreover, the Bantu languages spoken by the Kwisi  
422 and Twa have long been the subject of speculation (Westphal 1963). To evaluate the relationships between the  
423 Himba and Kuvale languages that are currently spoken in the Angolan Namib, as well as their links to Namibian  
424 Herero and to Nyaneka-Nkhumbi southwestern Bantu varieties, we first undertook a lexicostatistical analysis  
425 and calculated a language distance matrix based on 693 cognate sets. In the Neighbor-Joining tree based on the  
426 language distance matrix, Kuvale forms its own cluster, separated from Himba and Herero on one side and  
427 various dialects of Nyaneka-Nkhumbi on the other (Fig. 8a). Kuvale as spoken amongst the Kwisi and Kwepe is  
428 fully within the range of the cluster. The variety spoken by the Twa seems to have been influenced by Himba  
429 and lies in-between the Kuvale and the Himba/Herero clusters. Furthermore, based on a careful comparison of  
430 our Bantu wordlists with lexical data from Kwadi (Westphal 1963, supplemented by our own field notes), Khoe  
431 (Vossen 1997) and !Xun (König and Heine 2008) we note that no linguistic variety spoken in Namib displays  
432 any lexical peculiarities that could be linked to influence from a non-Bantu substrate. As a result of the nesting  
433 of linguistic varieties spoken by the peripatetic Kwisi, Twa and Kwepe within the range of Kuvale and

434 Herero/Himba, distance matrices based on linguistic and genetic distances between the Namib groups are  
435 uncorrelated (Mantel test,  $p = 0.18$ ).

436 To gain a better understanding of the historical relations between Nyaneka-Nkhumbi, Herero and Kuvale, we  
437 additionally undertook a Bayesian phylogenetic analysis in BEAST, using the same 693 cognate sets underlying  
438 the Neighbor-Joining tree in Figure 8a. As in our previous analysis, all language clusters (Herero, Kuvale and  
439 Nyaneka-Nkhumbi) are unequivocally identified ( $p = 1.00$ ; Fig. 8b; Fig. S7). The analysis further suggests a  
440 more recent common ancestor for Herero and Kuvale ( $p = 0.9$ ) than either language shares with the five  
441 varieties of Nyaneka-Nkhumbi we included in our analysis. This result is remarkably congruent with Model B  
442 of the ABC analysis, which suggests that Kuvale and Herero are more closely related than either population is to  
443 Nyaneka-Nkhumbi (Figs. 7 and 8b). Within Kuvale, we find no well-supported subclusters, except for the initial  
444 split from Twa ( $p = 1.00$ ), which is grouped with the other varieties, but remains an outlier (Fig. 8a; Fig. S7).

445

## 446 **DISCUSSION**

447

448 In recent years, a growing number of studies on the population history of southern Africa has considerably  
449 broadened our knowledge concerning the historical interactions of groups dwelling in and around the Kalahari  
450 Basin (Schlebusch et al. 2012; Pickrell et al. 2012; Barbieri et al. 2014b; Marks et al. 2015). Within this  
451 geographical area, the focus has largely been on “Khoisan”-speakers and the southeastern Bantu populations  
452 whose genetic and cultural make-ups are thought to have been shaped by contact with indigenous foragers and  
453 herders. In the Southwest, new genetic data have recently become available for populations from Namibia and  
454 southern Africa (Uren et al. 2016; Montinaro et al. 2017), while the groups to their north remain the subject of  
455 intense speculation, but constitute a noticeable gap in the available literature. Our study presents for the first  
456 time full maternal genomes and linguistic data from Angolan populations previously deemed inaccessible or  
457 vanished (Almeida 1965; Estermann 1976), including Bantu-speaking groups, as well as the formerly Kwadi-  
458 speaking Kwepe. We sampled both foraging and pastoral populations, placing special emphasis on the analysis  
459 of the coherence of the matriclanic system that characterizes the area and unites populations of different social  
460 status and modes of subsistence. In this framework, we are now able to address different historical hypotheses  
461 about the present-day diversity found in the Namib Desert both from a local perspective and within the context  
462 of the wider region of southern Africa.

463

### 464 **Genealogical consistency of matriclans**

465

466 A remarkable feature of the social organization of all the populations from the Angolan Namib and other  
467 southwestern Bantu peoples is their matrilineal descent-group system in which individuals are affiliated to the  
468 clan of their mother, and members of the same matriclan (sing. *eanda*) consider themselves as distant relatives  
469 that descend from an unknown founder woman (Estermann 1952; Gibson 1956; Bollig 2006). Although some  
470 populations may have dual descent systems and additionally form patrilans, it is the matrilineal principle that  
471 regulates key aspects of community life, such as cattle inheritance, social obligations, marriage preferences and  
472 group membership (Gibson 1956). However, the consistency of southwestern African matriclans has been  
473 difficult to validate with genealogical data, since the relationships between members of the same clan are often



474 considered to be too distant to be traced accurately (Gibson 1956; Viveló 1977). Furthermore, it has been  
475 suggested that members of low-status peripatetic communities borrowed the matrilineal system from their  
476 dominant neighbors as a means to achieve better integration into the regional network of the southwestern Bantu  
477 societies (Estermann 1976; Bollig 2004).

478 In this study we relied on the maternal inheritance of mtDNA to show for the first time that matrilineals are  
479 indeed good descriptors of deep genealogical relationships in pastoral and peripatetic Bantu-speakers from  
480 southwestern Angola. Several interrelated lines of evidence support this conclusion: i) a high proportion of the  
481 total mtDNA variation is found among matrilineals ( $\Phi_{st} = 0.51$ ;  $p < 0.00001$ ); ii) individuals from the same clan  
482 have a significantly increased probability of having related mtDNA haplotypes that are likely to belong to the  
483 same subhaplogroup (Figs. 3 and 5); iii) the average TMRCA of major subhaplogroups (~1,800 years) suggests  
484 that the oldest matrilineals are not recent and probably date back to the arrival of Bantu-speaking peoples to  
485 southern Africa.

486 In spite of this evidence, we found that several matrilineals likely became associated to more than one  
487 subhaplogroup through multiple founders in different populations. Since these cases often involve a  
488 subhaplogroup restricted to the Himba or Kuvale and a subhaplogroup predominant in the Kwepe, Twa or Kwisi  
489 (Fig. S2b, e, g, h, k), it may be argued that these low-status peripatetic communities were clanless and recently  
490 borrowed the matrilineal system from their dominant neighbors, as proposed previously (Estermann 1976;  
491 Bollig 2004). However, such an imitation scenario is difficult to reconcile with the antiquity and the  
492 genealogical consistency of the matrilineal system observed in all peripatetic populations (Table S7; Fig. 5b).  
493 Furthermore, our permutation tests indicate that random assignment of clans, as would be expected in a  
494 borrowing situation, is very unlikely in these communities (Table S6).

495 Alternatively, we find it more plausible that the Twa, Kwisi and Kwepe may have had their own matrilineal  
496 systems, and merely replaced their pre-existing clan labels with those of their dominant neighbors. This seems  
497 to be particularly evident among the Twa, who have a genealogically consistent matrilineal system based on a  
498 clan inventory similar to the Himba, despite their close genetic relationship with the Kwisi (Fig. 4b). The  
499 cultural approximation of the Twa to the Himba, which might be driven by geographical proximity (Fig. 1), is  
500 also reflected in the apparent influence of Himba on the linguistic variety spoken by the Twa (Fig. 8), as well as  
501 the documented tendency of the Twa to mimic the distinctive attire of the Himba women (Estermann 1952).  
502 More generally, it is likely that clan-switching has facilitated female gene flow from the peripatetics into the  
503 dominant communities (Fig. S1), thus explaining the reduced levels of sequence similarity observed within  
504 Himba and Kuvale clans (Fig. 5b; Fig. S2; Table S6).

505 The matrilineal organization of the Namib peoples seems to have had a strong impact on their current patterns  
506 of mtDNA variation. The fact that the percentage of the total genetic diversity that is found between clans ( $\Phi_{st} =$   
507  $0.51$ ) is much higher than that observed between populations ( $\Phi_{st} = 0.20$ ) suggests that ethnic groups arose from  
508 the assemblage of genetically different clans instead of clans being formed just by fissions occurring within  
509 groups. Thus, although both clan and group membership are determined by the mother, it is clear that the  
510 matrilineal principle is frequently violated during ethnogenesis. This pattern is especially striking among the  
511 Kuvale, who are highly endogamous and ethnically Bantu, yet comprise among their founders two descent  
512 groups (L0d1a1b1a and L0d1b1b; Figs. 2a and 3), including the powerful clan of the cattle (Mukwangombe),  
513 that ultimately trace their origin to “Khoisan” populations. This type of population structure closely mirrors



514 patterns of Y-chromosome variation previously reported in traditional patrilineal societies from other regions of  
515 the world (Chaix et al. 2004, 2007; Sanchez-Faddeev et al. 2013).

516

### 517 **The southwestern African pastoral scene: Herero, Himba, Damara and Kuvale**

518

519 The Himba and Kuvale from Angola are generally considered to be part of a broad cultural cluster of Bantu-  
520 speaking cattle herders that includes adjacent Himba groups from Namibia, as well as Herero populations  
521 extending from Namibia to Botswana (Bollig and Gewald 2009). Besides sharing many aspects of their pastoral  
522 culture, these peoples are commonly thought to speak dialects of the same Herero language, which has been  
523 grouped with Nyaneka-Nkhumbi and Ovambo into a division of southwestern Bantu referred to as Cimbabesia  
524 (Vansina 2004). However, the internal relations and migration routes of the southwestern Bantu herders, as well  
525 as the origins of their pastoral tradition remain poorly understood (Gibson 1977; Bollig and Gewald 2009).

526 Our results, together with previous work, show that the Himba, Tjimba and Herero share a mtDNA profile that  
527 sets them apart from the Kuvale and other Bantu-speaking populations, but is not significantly different from the  
528 Damara who speak the same Khoe-Kwadi language as the pastoral Nama (Figs. 2b and 6a) (Coelho et al. 2009;  
529 Barbieri et al. 2014b).

530 The most striking aspect of the Kuvale's maternal heritage is the high frequency (~50%) of characteristic  
531 "Khoisan" lineages associated with sequence types (L0d1a1b1a and L0d1b1b) that are likely to be derived from  
532 only two ancestral women (Figs. 2a and 3). In contrast, the Himba, Herero and Damara have much lower  
533 frequencies of "Khoisan" mtDNA (10-17%), and share unusually high frequencies of subhaplogroup L3d3a (38-  
534 61%), which is present in several Bantu, Kx'a and Khoe-Kwadi speaking populations of southwestern Africa  
535 (Fig. S5j; Soodyall and Jenkins 1993; Barbieri et al. 2014b).

536 Previous interpretations of this mtDNA pattern have proposed that L3d3a was a pre-Bantu lineage retained by  
537 the Damara that was subsequently transferred to the Himba and the Herero through admixture, instead of being  
538 inherited from a common ancestor by all three populations (Barbieri et al. 2014b). By using ABC analysis to  
539 explicitly test alternative evolutionary hypotheses about the relationships between the Kuvale, the Nyaneka-  
540 Nkhumbi and a meta-group lumping the Himba, Herero and Damara (HHD), we found that the maternal  
541 heritage of the latter group is nested within the southwestern Bantu peoples and shares a recent common  
542 ancestor with the Kuvale (Fig. 7). In this context, it seems likely that the HHD and Kuvale represent the  
543 southern and northern branches, respectively, of a proto-population whose origins may be tentatively placed to  
544 the east of their present locations on the basis of the geographic distribution of their most common DNA  
545 lineages (Fig. S5e, f, j, k). The separation between the HHD and the Kuvale is paralleled by our linguistic  
546 results, which show that the Kuvale language cannot be considered a mere dialect of Herero, as was previously  
547 assumed (Estermann 1981). According to this scenario, it is reasonable to assume that the Damara, like the  
548 Tjimba, are a cattleless branch of the Himba/Herero who changed their original Herero language after entering  
549 into a subordinate, peripatetic-like relationship with the pastoral Nama. Unlike the Damara, the Kuvale share  
550 most aspects of their pastoral culture with the Himba and Herero, in spite of their present genetic divergence  
551 (Fig. 7).

552 Recent genome-wide polymorphism data has shown that the Himba, Herero and Damara share a genetic  
553 component that is found at lower frequencies in southwestern Bantu populations from the Atlantic coast to the

554 Okavango Delta (Uren et al. 2016; Montinaro et al. 2017). These results, together with our mtDNA and  
555 linguistic data, are remarkably consistent with a previously-suggested scenario (Vansina 2004) in which the  
556 Bantu pastoralists from Southwest Africa are an offshoot of the Ovambo and/or Nyaneka-Nkhumbi  
557 agropastoralists living around the Kunene river basin, who moved into the dry coastal areas of Namibia and  
558 Angola. In this framework, it is likely that the different combinations of genetic, linguistic and cultural profiles  
559 currently observed in the Himba, Herero, Damara, and Kuvale result from genetic drift, differential admixture  
560 and social stratification, instead of reflecting remote geographic origins or assimilation of pre-Bantu  
561 components other than “Khoisan” (cf. Vedder and Inskip, 2003; Möhlig, 2009)

562

### 563 **The peoples of the Kuroca River: Kwisi, Twa and Kwepe**

564

565 Due to their combination of a peripatetic way of life with a physical appearance that is indistinguishable from  
566 their Bantu neighbors, the Kwisi, Twa and Kwepe are frequently seen as the Angolan representatives of a wider  
567 group of populations whose origins are often linked to hypothetical pre-Bantu populations different from the  
568 Kx’a and Tuu-speaking foragers (Westphal 1963; Cashdan 1986; Barnard 1992; Blench 2006; Güldemann  
569 2008).

570 While our results show that the Kwisi and the Twa form a relatively homogeneous group that is remarkably  
571 different from all other southern African peoples (Figs. 2a and 6a), it is doubtful whether this differentiation  
572 could entirely reflect the genetic composition of a pre-Bantu remnant population.

573 The uniqueness of the two populations can be attributed to their high frequencies of subhaplogroups L0a1b1  
574 (21%), L0a1b2 (11%), L0a2a1b (31%) and L1c1b (22%), which represent approximately 85% on average of  
575 their mtDNA composition and are collectively much less frequent in the Himba (18%) and Kuvale (8%) (Fig.  
576 2b; Table S4). Among these four subhaplogroups, L0a1b1 and L0a2a1b are most probably of Bantu origin, since  
577 their haplotypes are molecularly close to sequences that are observed in several Bantu-speaking populations  
578 from Zambia and Botswana (Fig. 2b; Fig. S5b, d). Haplotypes from subhaplogroups L0a1b2 and L1c1b are  
579 confined to the Angolan Namib and have a less clear origin (Fig. S5c, i). While the long internal branches to  
580 their closest sequences suggest ancient isolation (Fig. S5c, i), this pattern might also be due to insufficient  
581 sampling (Kivisild 2006), or fragmentation of a large ancestral population (Nielsen and Beaumont 2009).

582 Additional evidence for a link between the Kwisi and Twa and other Bantu peoples of the region is provided by  
583 the time depth and genealogical consistency of their clan system (see above), which further suggest that they are  
584 likely to be part of the constellation of matrilineal peoples that spread across southwestern Africa (Table S7;  
585 Fig. 5b).

586 In this context, the genetic uniqueness of the Twa/ Kwisi is probably better understood in the frame of a fusion-  
587 fission model, where the effects of genetic drift on mtDNA variation are enhanced by the influence of  
588 matrilineal kinship on population splitting and ethnogenesis (Neel and Salzano 1967; Fix 1999). Moreover, it is  
589 likely that this genetic differentiation was maintained and reinforced by the highly hierarchized social setting of  
590 pastoral societies, where impoverished cattleless peoples are marginalized by their dominant neighbors (Vansina  
591 2004).

592 The relationships between the Twa, Kwisi and Kwepe have also been a matter of contention (Almeida 1965;  
593 Estermann 1976; Cashdan 1986). Recently, based on the fact that the Kwepe formerly spoke Kwadi, and on the

594 conclusion that this language could be grouped with Khoe in a single family, Güldemann (2008) suggested that  
595 the Kwepe were part of a putative pre-Bantu Khoe-Kwadi migration introducing pastoralism from eastern to  
596 southern Africa.

597 Our results show that the Kwepe have a very homogeneous mtDNA profile (only 5 different haplotypes; Table  
598 S4) that bears no resemblance to any other Khoe-Kwadi-speaking population and is largely shared with their  
599 neighbors from the Angolan Namib (Fig. S1). While the most common haplotype among the Kwepe is an  
600 L3f1b4 lineage (49%) with a likely Himba origin (Fig. 2b; Fig. S1), the other Kwepe haplotypes all belong to  
601 subhaplogroups L0a1b1 (27%) or L1c1b (24%) that are more common and diverse in the Twa and Kwisi (Fig.  
602 2b; Fig. S1). These observations suggest that the Kwisi, Twa and Kwepe, who have overlapping residential areas  
603 around the Kuroca intermittent river (Fig. 1), were originally the same people, and that the Kwepe mtDNA pool  
604 was disproportionately impacted by a single woman, or a kin group, migrating out of the Himba. The genetic  
605 similarity of the Kwepe to immediate geographic neighbors displaying Bantu-related mtDNA profiles, rather  
606 than to other Khoe-Kwadi-speaking groups, suggests that their former use of Kwadi resulted from language shift  
607 after contact with a group of migrants that brought the Kwadi language to the Angolan Namib. So far the only  
608 available evidence for a possible genetic contribution of any Khoe-Kwadi migrants to the area is the occurrence  
609 in all Namib populations of the lactase persistence -14010\*C allele (Pinto et al. 2016), which is found with  
610 elevated frequencies in several Khoe-Kwadi-speaking peoples of southern Africa (Macholdt et al. 2014). This  
611 evidence suggests that there might have been a measurable genetic impact associated with the original Kwadi-  
612 speakers that is not captured in the maternal lineages, and might be revealed by Y-chromosome markers and  
613 autosomal genome-wide data (currently under analysis).

614 In any case, the association of the Kwepe with the Kwadi language and a mtDNA profile that is largely derived  
615 from the Bantu, combined with the possibility that the Damara represent a branch of the Herero (see above), has  
616 important implications for the understanding of the spread of the Khoe-Kwadi family and pastoralism across  
617 southern Africa. When linguistically and geographically diverse populations from the region are compared, the  
618 most remarkable characteristic of all Khoe-Kwadi speaking peoples is their lack of a common mtDNA genetic  
619 heritage (Fig. 6a; Fig. S4). This absence of an mtDNA identity is paralleled by recent data on autosomal DNA  
620 variation, showing that many Khoe-Kwadi-speaking groups are genetically closer to populations occupying the  
621 same broad geographical area than they are to each other (Pickrell et al. 2012; Uren et al. 2016; Montinaro et al.  
622 2017). Taken together, these patterns suggest that the spread of Khoe-Kwadi and its putative pastoral  
623 innovations were part of a complex process that cannot be simply modelled by a wave of advance similar to the  
624 spread of agriculture in Europe (Pinhasi et al. 2005), nor by a rapid replacement model, analogous to the Bantu  
625 expansions (reviewed in Rocha and Fehn 2016; see also Diamond and Bellwood 2003). It seems more likely  
626 that many southern African groups adopted the Khoe-Kwadi language (and occasionally pastoralism) with only  
627 a small genetic contribution of incoming Khoe-Kwadi migrants. Our results now indicate that this type of  
628 cultural shift not only affected indigenous “Khoisan” foragers, but also impacted Bantu populations from  
629 southwestern Africa, leading to the emergence of new ethnic identities that are commonly perceived as  
630 enigmatic.

631

632

633

634 **ACKNOWLEDGEMENTS**

635

636 The authors thank all sample donors for their participation in this study, the governments of Namibe and Kunene  
637 Provinces in Angola for supporting our work, João Guerra, Raimundo Dungulo, and Serafim Nemésio for  
638 assistance in the preparation of field work, António Mbeape, José Domingos, and Okongo Toko for assistance  
639 with sample collection, Roland Schröder and Enrico Macholdt for assistance in the lab, Shengyu Ni for  
640 assistance in the processing of sequencing data, Michael Dannemann, Cesare de Filippo and António M Santos  
641 for help in statistical analyses, and Chiara Barbieri for valuable advice. Financial support for this research was  
642 provided by FEDER funds through the Operational Programme for Competitiveness Factors— COMPETE, by  
643 National Funds through FCT—Foundation for Science and Technology under the PTDC/BIA-EVF/ 2907/2012  
644 and FCOMP-01-0124-FEDER- 028341, and by the Max Planck Society. SO was supported by the FCT grant  
645 SFRH/BD/85776/2012, and MG-V by FP7-REGPOT-2011-1-project 286431, UID/BIA/50027/2013 and POCI-  
646 01-0145-FEDER-006821. BP acknowledges the LABEX ASLAN (ANR-10-LABX-0081) of Université de Lyon  
647 for its financial support within the program “Investissements d’Avenir” (ANR-11-IDEX-0007) of the French  
648 government operated by the National Research Agency (ANR). This is scientific paper no. 7 from the  
649 Portuguese-Angolan TwinLab established between CIBIO/InBIO and ISCED/Huíla, Lubango. This work is  
650 dedicated to the memory of our colleague Samuel Aço.

651 **REFERENCES**

652

653 Almeida A (1965) Bushmen and other non-Bantu peoples of Angola: three lectures. Witwatersrand University  
654 Press, Johannesburg

655 Andrews RM, Kubacka I, Chinnery PF, et al (1999) Reanalysis and revision of the Cambridge reference  
656 sequence for human mitochondrial DNA. *Nat Genet* 23:147. doi: 10.1038/13779

657 Atkinson QD, Meade A, Venditti C, et al (2008) Languages Evolve in Punctuational Bursts. *Science* 319:588–  
658 588. doi: 10.1126/science.1149683

659 Baele G, Li WLS, Drummond AJ, et al (2013) Accurate model selection of relaxed molecular clocks in  
660 Bayesian phylogenetics. *Mol Biol Evol* 30:239–243. doi: 10.1093/molbev/mss243

661 Bahuchet S (2012) Changing Language, Remaining Pygmy. *Hum Biol* 84:11–43. doi: 10.3378/027.084.0101

662 Bandelt HJ, Forster P, Rohl A (1999) Median-joining networks for inferring intraspecific phylogenies. *Mol Biol*  
663 *Evol* 16:37–48. doi: 10.1093/oxfordjournals.molbev.a026036

664 Barbieri C, Güldemann T, Naumann C, et al (2014a) Unraveling the complex maternal history of Southern  
665 African Khoisan populations. *Am J Phys Anthropol* 153:435–448. doi: 10.1002/ajpa.22441

666 Barbieri C, Vicente M, Oliveira S, et al (2014b) Migration and interaction in a contact zone: mtDNA variation  
667 among Bantu-speakers in Southern Africa. *PLoS One*. doi: 10.1371/journal.pone.0099117

668 Barbieri C, Whitten M, Beyer K, et al (2012) Contrasting maternal and paternal histories in the linguistic  
669 context of Burkina Faso. *Mol Biol Evol* 29:1213–23. doi: 10.1093/molbev/msr291

670 Barnard A (1992) Hunters and Herders of Southern Africa: A Comparative Ethnography of the Khoisan Peoples.  
671 Cambridge University Press, Cambridge

672 Beaumont MA, Zhang W, Balding DJ (2002) Approximate Bayesian computation in population genetics.  
673 *Genetics* 162:2025–2035.

674 Behar DM, Vilems R, Soodyall H, et al (2008) The dawn of human matrilineal diversity. *Am J Hum Genet*  
675 82:1130–1140. doi: 10.1016/j.ajhg.2008.04.002.

676 Blench RM (2006) *Archaeology, Language, and the African Past*. Rowman Altamira, Lanham, MD

677 Bollig M (2004) Hunters, foragers, and Singing Smiths: The Metamorphosis of Peripatetic Peoples in Africa.  
678 *Cust strangers New Perspect peripatetic peoples Middle East, Africa, Asia* 195–231.

679 Bollig M (2006) *Risk Management in a Hazardous Environment*. Springer, New York

680 Bollig M, Gewald J-B (2009) *People, Cattle and Land: Transformations of a Pastoral Society*. Rüdiger Köppe,  
681 Köln

682 Bouckaert R (2010) DensiTree: making sense of sets of phylogenetic trees. *Bioinformatics* 26:1372–1373. doi:  
683 10.1093/bioinformatics/btq110

- 684 Bouckaert R, Heled J, Kühnert D, et al (2014) BEAST 2: A Software Platform for Bayesian Evolutionary  
685 Analysis. *PLoS Comput Biol* 10:e1003537. doi: 10.1371/journal.pcbi.1003537
- 686 Bouckaert R (2016) BEAST analysis backing effective linguistics. <https://github.com/rbouckaert/Babel>.
- 687 Breton G, Schlebusch CM, Lombard M, et al (2014) Lactase persistence alleles reveal partial east African  
688 ancestry of southern African Khoe pastoralists. *Curr Biol* 24:852–858. doi: 10.1016/j.cub.2014.02.041
- 689 Cashdan E (1986) *Hunter-gatherers of the northern Kalahari*. Helmut Buske Verlag, Hamburg
- 690 Chaix R, Austerlitz F, Khegay T, et al (2004) The Genetic or Mythical Ancestry of Descent Groups: Lessons  
691 from the Y Chromosome. *Am J Hum Genet* 75:1113–1116. doi: 10.1086/425938
- 692 Chaix R, Quintana-Murci L, Hegay T, et al (2007) From social to genetic structures in central Asia. *Curr Biol*  
693 17:43–48. doi: <https://doi.org/10.1016/j.cub.2006.10.058>
- 694 Coelho M, Sequeira F, Luiselli D, et al (2009) On the edge of Bantu expansions: mtDNA, Y chromosome and  
695 lactase persistence genetic variation in southwestern Angola. *BMC Evol Biol* 9:80. doi: 10.1186/1471-  
696 2148-9-80
- 697 de Filippo C, Key FM, Ghirotto S, et al (2016) Recent Selection Changes in Human Genes under Long-Term  
698 Balancing Selection. *Mol Biol Evol* 33:1435–1447. doi: 10.1093/molbev/msw023
- 699 Diamond J, Bellwood P (2003) Farmers and Their Languages: The First Expansions. *Science* 300:597–603. doi:  
700 10.1126/science.1078208
- 701 Edgar RC (2004) MUSCLE: multiple sequence alignment with high accuracy and high throughput. *Nucleic*  
702 *Acids Res* 32:1792–7. doi: 10.1093/nar/gkh340
- 703 Estermann C (1976) *The Ethnography of Southwestern Angola: The Non-Bantu Peoples. The Ambo Ethnic*  
704 *Group* (translated and edited by Gibson GD). Africana Pub. Co
- 705 Estermann C (1981) *The Ethnography of Southwestern Angola: The Herero People* (translated and edited by  
706 Gibson GD). Africana Pub. Co
- 707 Estermann C (1952) Clans et alliances entre clans dans le sud-ouest de l'Angola. *Anthropos* 47:587–606.
- 708 Excoffier L, Dupanloup I, Huerta-Sánchez E, et al (2013) Robust Demographic Inference from Genomic and  
709 SNP Data. *PLoS Genet* 9:e1003905. doi: 10.1371/journal.pgen.1003905
- 710 Excoffier L, Lischer HEL (2010) Arlequin suite ver 3.5: A new series of programs to perform population  
711 genetics analyses under Linux and Windows. *Mol Ecol Resour* 10:564–567. doi: 10.1111/j.1755-  
712 0998.2010.02847.x
- 713 Fenner JN (2005) Cross-cultural estimation of the human generation interval for use in genetics-based  
714 population divergence studies. *Am J Phys Anthropol* 128:415–423. doi: 10.1002/ajpa.20188
- 715 Fix A (1999) *Migration and colonization in human microevolution*. Cambridge University Press, Cambridge



- 716 Forster P, Harding R, Torroni A, Bandelt HJ (1996) Origin and evolution of Native American mtDNA variation:  
717 a reappraisal. *Am J Hum Genet* 59:935–45.
- 718 Gibson GD (1977) Foreword. In: Viveló F (ed) *In The Herero of Western Botswana: Aspects of Change in a*  
719 *Group of Bantu-Speaking Cattle Herders*. West Publishing, St. Paul
- 720 Gibson GD (1956) Double Descent and Its Correlates among the Herero of Ngamiland. *Am Anthropol* 58:109–  
721 139. doi: 10.1525/aa.1956.58.1.02a00080
- 722 Greenberg J (1963) *The Languages of Africa*. Indiana University, Bloomington, IN
- 723 Greenhill SJ, Gray RD (2009) Austronesian language phylogenies: myths and misconceptions about Bayesian  
724 computational methods. *Pacific Linguistics*, Canberra
- 725 Güldemann T (2008) A linguist’s view: Khoe-Kwadi speakers as the earliest food-producers of southern Africa.  
726 *South African Humanit* 20:93–132.
- 727 Güldemann T, Fehn A (eds) (2014) *Beyond “Khoisan”: Historical Relations in the Kalahari Basin*. John  
728 Benjamins Publishing Company
- 729 Hartigan JA, Wong MA (1979) A K-Means Clustering Algorithm. *Appl Stat* 28:100–108. doi: 10.2307/2346830
- 730 Haspelmath M, Tadmor U (eds) (2009) *Loanwords in the world’s languages: a comparative handbook*. Mouton  
731 de Gruyter, Berlin & New York
- 732 Henn BM, Gignoux C, Lin AA, et al (2008) Y-chromosomal evidence of a pastoralist migration through  
733 Tanzania to southern Africa. *Proc Natl Acad Sci* 105:10693–10698. doi: 10.1073/pnas.0801184105
- 734 Jordan L (2015) A comparison of five speech varieties from southwestern Angola.
- 735 Jordan L, Manuel I (2013) Sociolinguistic survey of the Nyaneka variants, with a special focus on the variants  
736 of Huíla Province.
- 737 Kivisild T (2006) *Human mitochondrial DNA and the evolution of Homo sapiens*. Springer, Berlin
- 738 Kloss-Brandstätter A, Pacher D, Schönherr S, et al (2011) HaploGrep: A fast and reliable algorithm for  
739 automatic classification of mitochondrial DNA haplogroups. *Hum Mutat* 32:25–32. doi:  
740 10.1002/humu.21382
- 741 König C, Heine B (2008) *A concise dictionary of Northwestern! Xun*. Rüdiger Köppe, Köln
- 742 Langmead B, Salzberg SL (2012) Fast gapped-read alignment with Bowtie 2. *Nat Methods* 9:357–9. doi:  
743 10.1038/nmeth.1923
- 744 Leuenberger C, Wegmann D (2010) Bayesian computation and model selection without likelihoods. *Genetics*  
745 184:243–252. doi: 10.1534/genetics.109.109058
- 746 Li H, Durbin R (2009) Fast and accurate short read alignment with Burrows-Wheeler transform. *Bioinformatics*  
747 25:1754–60. doi: 10.1093/bioinformatics/btp324

- 748 Li M, Schroeder R, Ko A, Stoneking M (2012) Fidelity of capture-enrichment for mtDNA genome sequencing:  
749 Influence of NUMTs. *Nucleic Acids Res.* doi: 10.1093/nar/gks499
- 750 Li M, Stoneking M (2012) A new approach for detecting low-level mutations in next-generation sequence data.  
751 *Genome Biol* 13:R34. doi: 10.1186/gb-2012-13-5-r34
- 752 MacCalman H, Grobbelaar B (1965) Preliminary report of two stone-working OvaTjimba groups in the northern  
753 Kaokoveld of South West Africa. Staatsmuseum, Windhoek
- 754 Macholdt E, Lede V, Barbieri C, et al (2014) Tracing pastoralist migrations to southern Africa with lactase  
755 persistence alleles. *Curr Biol* 24:875–879. doi: 10.1016/j.cub.2014.03.027
- 756 Maho J (2009) NUGL Online: The online version of the New Updated Guthrie List, a referential classification  
757 of the Bantu languages. <http://goto.glocalnet.net/mahopapers/nuglonline.pdf>.
- 758 Maricic T, Whitten M, Pääbo S (2010) Multiplexed DNA sequence capture of mitochondrial genomes using  
759 PCR products. *PLoS One* 5:e14004. doi: 10.1371/journal.pone.0014004
- 760 Marks SJ, Montinaro F, Levy H, et al (2015) Static and Moving Frontiers: The Genetic Landscape of Southern  
761 African Bantu-Speaking Populations. *Mol Biol Evol* 32:29–43. doi: 10.1093/molbev/msu263
- 762 Meyer M, Kircher M (2010) Illumina sequencing library preparation for highly multiplexed target capture and  
763 sequencing. *Cold Spring Harb Protoc* 2010:pdb.prot5448. doi: 10.1101/pdb.prot5448
- 764 Möhlig W (2009) The language history of Herero as a source of ethnohistorical interpretations. Rüdiger Köppe,  
765 Köln
- 766 Möhlig W, Kavari J (2008) Reference Grammar of Herero (Otjiherero) Bantu Language of Namibia: With a  
767 Glossary Otjiherero-English-Otjiherero. Rüdiger Köppe, Köln
- 768 Montinaro F, Busby GBJ, Gonzalez-Santos M, et al (2017) Complex ancient genetic structure and cultural  
769 transitions in Southern African populations. *Genetics* 205:303–316. doi: 10.1534/genetics.116.189209
- 770 Neel J V, Salzano FM (1967) Further studies on the Xavante Indians. X. Some hypotheses-generalizations  
771 resulting from these studies. *Am J Hum Genet* 19:554–74.
- 772 Neuenschwander S, Largiadèr CR, Ray N, et al (2008) Colonization history of the Swiss Rhine basin by the  
773 bullhead (*Cottus gobio*): Inference under a Bayesian spatially explicit framework. *Mol Ecol* 17:757–772.  
774 doi: 10.1111/j.1365-294X.2007.03621.x
- 775 Nicholls GK, Gray R (2006) Quantifying uncertainty in a stochastic Dollo model of vocabulary evolution.  
776 *Phylogenetic methods prehistory Lang* 161–172.
- 777 Nielsen R, Beaumont MA (2009) Statistical inferences in phylogeography. *Mol Ecol* 18:1034–1047. doi:  
778 10.1111/j.1365-294X.2008.04059.x
- 779 Oven M Van, Kayser M (2008) Updated Comprehensive Phylogenetic Tree of Global Human Mitochondrial  
780 DNA Variation. *Hum Mutat* 386–394. doi: 10.1002/humu.20921

- 781 Paradis E, Claude J, Strimmer K (2004) APE: Analyses of Phylogenetics and Evolution in R language.  
782 *Bioinformatics* 20:289–290. doi: 10.1093/bioinformatics/btg412
- 783 Penny D, McComish BJ, Charleston MA, Hendy MD (2001) Mathematical elegance with biogeochemical  
784 realism: the covarion model of molecular evolution. *J Mol Evol* 53:711–723. doi: 10.1007/s002390010258
- 785 Pickrell JK, Patterson N, Barbieri C, et al (2012) The genetic prehistory of southern Africa. *Nat Commun*  
786 3:1143. doi: 10.1038/ncomms2140
- 787 Pinhasi R, Fort J, Ammerman AJ (2005) Tracing the Origin and Spread of Agriculture in Europe. *PLoS Biol*  
788 3:e410. doi: 10.1371/journal.pbio.0030410
- 789 Pinto JC, Oliveira S, Teixeira S, et al (2016) Food and pathogen adaptations in the Angolan Namib desert:  
790 Tracing the spread of lactase persistence and human African trypanosomiasis resistance into southwestern  
791 Africa. *Am J Phys Anthropol* 161:436–447. doi: 10.1002/ajpa.23042
- 792 Rambaut A, Drummond A (2007) Tracer v1. 4. <http://beast.bio.ed.ac.uk/Tracer>.
- 793 Renaud G, Stenzel U, Kelso J (2014) LeeHom: Adaptor trimming and merging for Illumina sequencing reads.  
794 *Nucleic Acids Res* 42:e141. doi: 10.1093/nar/gku699
- 795 Renaud G, Stenzel U, Maricic T, et al (2015) DeML: Robust demultiplexing of Illumina sequences using a  
796 likelihood-based approach. *Bioinformatics* 31:770–772. doi: 10.1093/bioinformatics/btu719
- 797 Rocha J, Fehn A-M (2016) Genetics and Demographic History of the Bantu. *eLS* 1–9. doi:  
798 10.1002/9780470015902.a0022892
- 799 Russell T, Silva F, Steele J (2014) Modelling the spread of farming in the bantu-speaking regions of africa: An  
800 archaeology-based phylogeography. *PLoS One* 9:e87854. doi: 10.1371/journal.pone.0087854
- 801 Sadr K (2015) Livestock first reached southern Africa in two separate events. *PLoS One*. doi:  
802 10.1371/journal.pone.0134215
- 803 Sanchez-Faddeev H, Pijpe J, van der Hulle T, et al (2013) The influence of clan structure on the genetic  
804 variation in a single Ghanaian village. *Eur J Hum Genet* 21:1134–1139. doi: 10.1038/ejhg.2013.12
- 805 Schlebusch CM, Skoglund P, Sjodin P, et al (2012) Genomic Variation in Seven Khoe-San Groups Reveals  
806 Adaptation and Complex African History. *Science* (80-) 338:374–379. doi: 10.1126/science.1227721
- 807 Snider K, Roberts J (2006) SIL comparative African wordlist. *J West Afr Lang* 31:73–122.
- 808 Soares P, Ermini L, Thomson N, et al (2009) Correcting for Purifying Selection: An Improved Human  
809 Mitochondrial Molecular Clock. *Am J Hum Genet* 84:740–759. doi: 10.1016/j.ajhg.2009.05.001
- 810 Soodyall H, Jenkins T (1993) Mitochondrial DNA polymorphisms in Negroid populations from Namibia: new  
811 light on the origins of the Dama, Herero and Ambo. *Ann Hum Biol* 20:477–485. doi:  
812 10.1080/03014469300002872
- 813 Swadesh, Morris (1952) Lexicostatistic Dating of Prehistoric Ethnic Contacts. *Proc Am Philos Soc* 96: 452–463.

- 814 Uren C, Kim M, Martin AR, et al (2016) Fine-scale human population structure in southern Africa reflects  
815 ecological boundaries - Supplementary information. *Genetics* 204:303–314. doi: 10.1101/038729
- 816 Vansina J (2004) *How societies are born: Governance in West Central Africa before 1600*. University of Virginia  
817 Press, Charlottesville
- 818 Vashro L, Cashdan E (2015) Spatial cognition, mobility, and reproductive success in northwestern Namibia.  
819 *Evol Hum Behav* 36:123–129. doi: 10.1016/j.evolhumbehav.2014.09.009
- 820 Vedder H, Inskip A (2003) *Heinrich Vedder's The Bergdama: An Annotated Translation of the German*  
821 *Original with Additional Ethnographic Material*. Rüdiger Köppe, Köln
- 822 Veeramah KR, Wegmann D, Woerner A, et al (2012) An early divergence of KhoeSan ancestors from those of  
823 other modern humans is supported by an ABC-based analysis of autosomal resequencing data. *Mol Biol*  
824 *Evol* 29:617–630. doi: 10.1093/molbev/msr212
- 825 Venables WN, Ripley BD (2002) *Modern Applied Statistics with S*, 4th edn. Springer, New York
- 826 Viveló F (1977) *The Herero of western Botswana: aspects of change in a group of Bantu-speaking cattle*  
827 *herders*. West Publishing, St. Paul
- 828 Vossen R (1997) *Die Khoe-Sprachen: Ein Beitrag zur Erforschung der Sprachgeschichte Afrikas*. Rüdiger  
829 Köppe, Köln
- 830 Warmelo N Van (1951) *Notes on the Kaokoveld (South West Africa) and its people*. Government printer,  
831 Pretoria
- 832 Wegmann D, Excoffier L (2010) Bayesian inference of the demographic history of chimpanzees. *Mol Biol Evol*  
833 27:1425–1435. doi: 10.1093/molbev/msq028
- 834 Wegmann D, Leuenberger C, Excoffier L (2009) Efficient approximate Bayesian computation coupled with  
835 Markov chain Monte Carlo without likelihood. *Genetics* 182:1207–1218. doi:  
836 10.1534/genetics.109.102509
- 837 Wegmann D, Leuenberger C, Neuenschwander S, Excoffier L (2010) ABCtoolbox: a versatile toolkit for  
838 approximate Bayesian computations. *BMC Bioinformatics* 11:116. doi: 10.1186/1471-2105-11-116
- 839 Westphal EOJ (1963) *The Linguistic Prehistory of Southern Africa: Bush, Kwadi, Hottentot, and Bantu*  
840 *Linguistic Relationships*. *Africa (Lond)* 33:237–265. doi: 10.2307/1157418

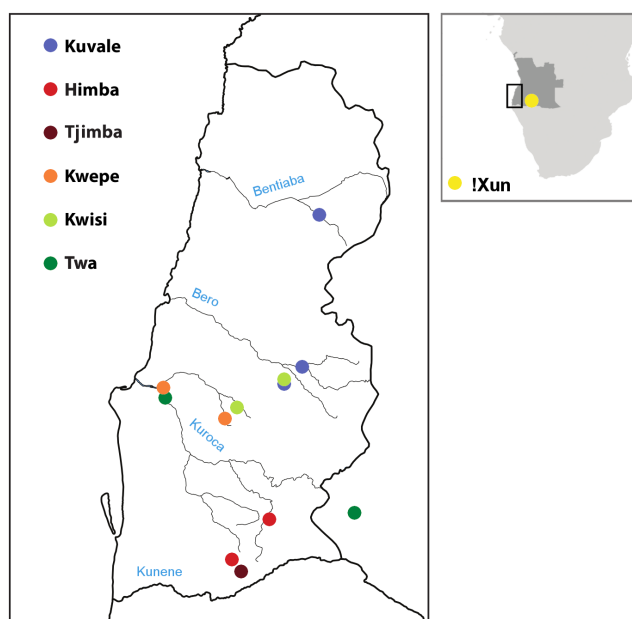

**Fig. 1** Map of sampling locations. Each location is colored by the corresponding population. On the right, Angola is highlighted in dark grey. On the left, an expanded view of the Angolan Namib (bold contour) is shown. The names of the main intermittent rivers are shown in blue.

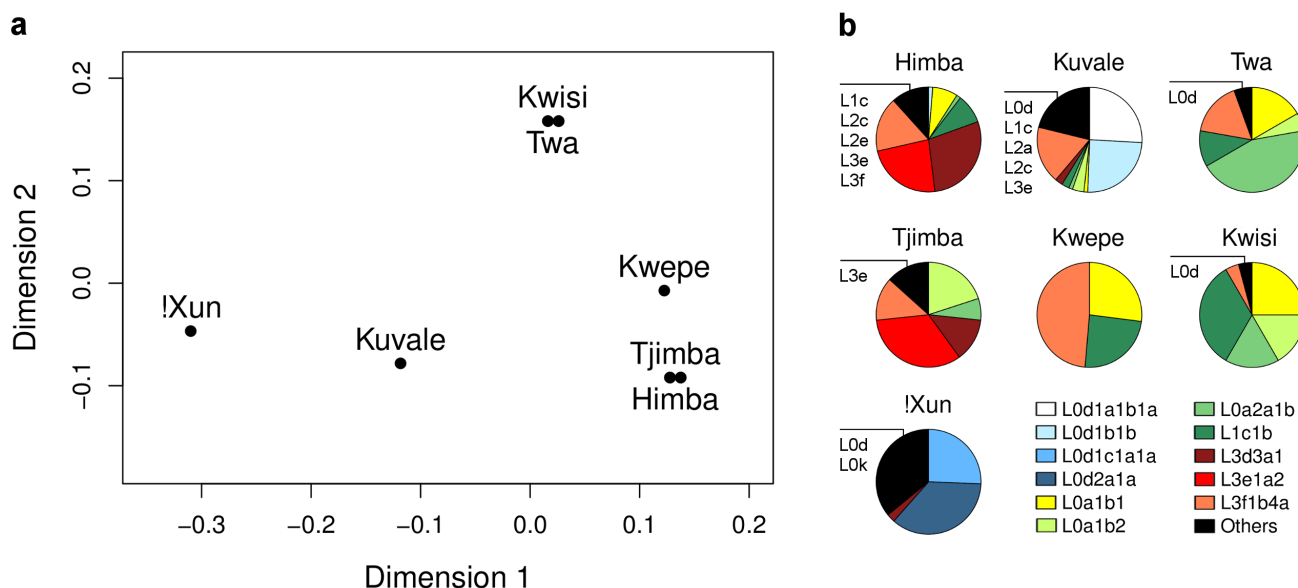

**Fig. 2** Multidimensional scaling analysis and haplogroup variation in southwestern Angola. (a) MDS plot based on  $\Phi_{st}$  genetic distances. The pairs Kwisi-Twa and Tjimba-Himba are not significantly different, with  $p$ -values 0.11 and 0.16, respectively. Stress value: 0.006. (b) Frequencies of the most common subhaplogroups ( $\geq 20\%$  in at least one population) are shown for each population. The remaining subhaplogroups are pooled under the category "Others" (black), with the major haplogroup assignments within this category listed for each population. Note that major haplogroups that are represented in the plots by a specific subhaplogroup, might appear again in the category "Others" to indicate other low frequency subhaplogroups.



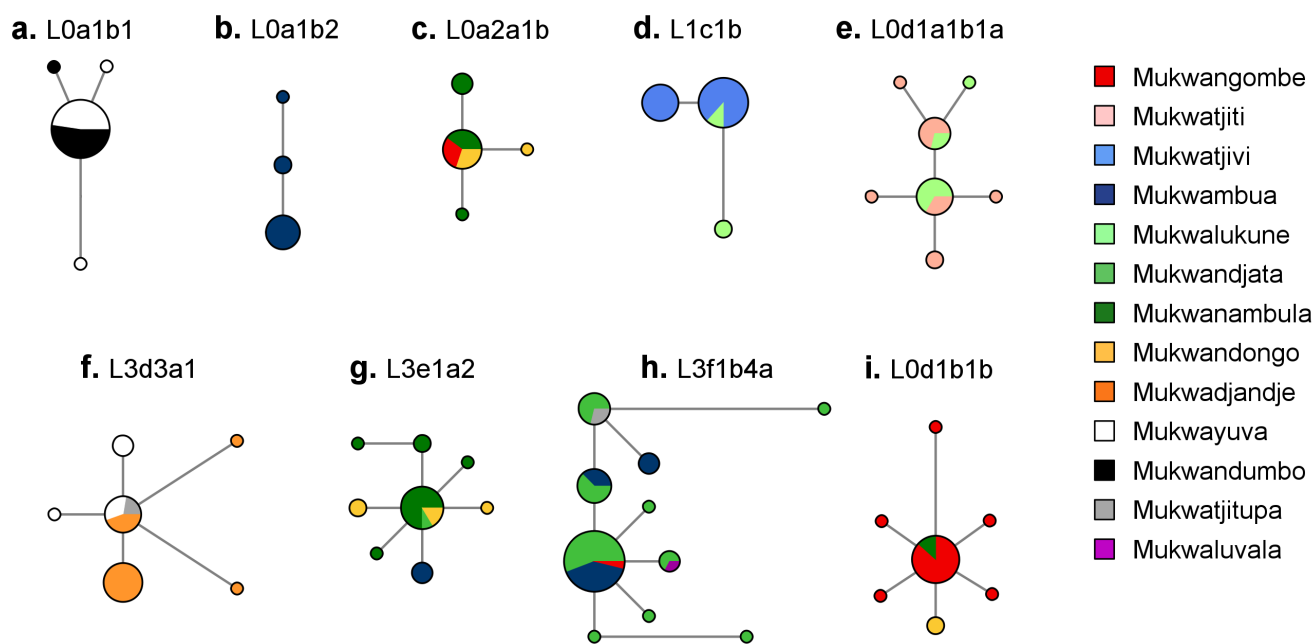

**Fig. 3** Median-joining networks showing haplotype variation within the most common subhaplogroups of the Angolan Namib. Circles represent mtDNA haplotypes, with size proportional to frequency and color corresponding to clan affiliation. Line lengths are proportional to the number of mutational steps. Indels were not included.

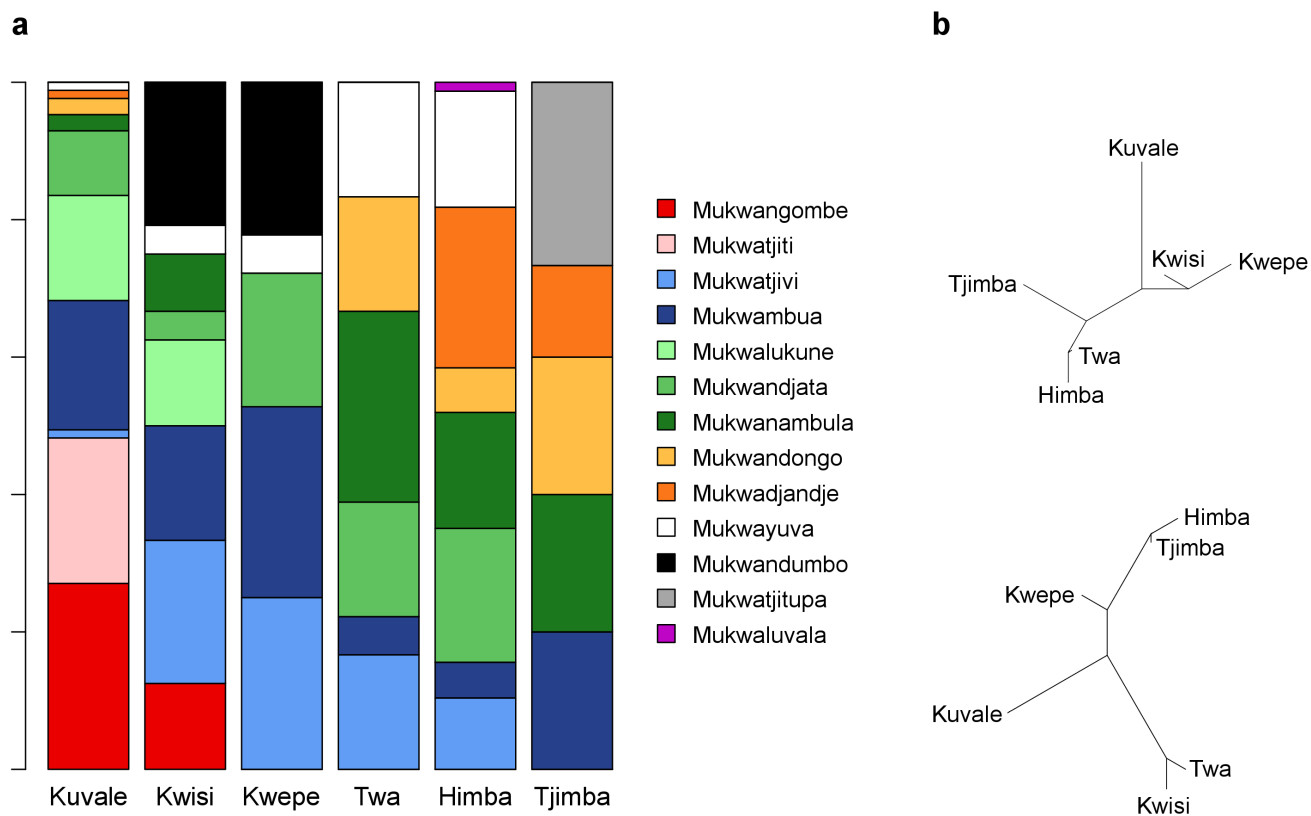

**Fig. 4** Relationship between genetic and clanic distances in populations of the Angolan Namib. (a) Matriclan distribution within each population. (b) Neighbor-joining tree based on clan distances (top) and  $\Phi_{st}$  genetic distances (bottom).

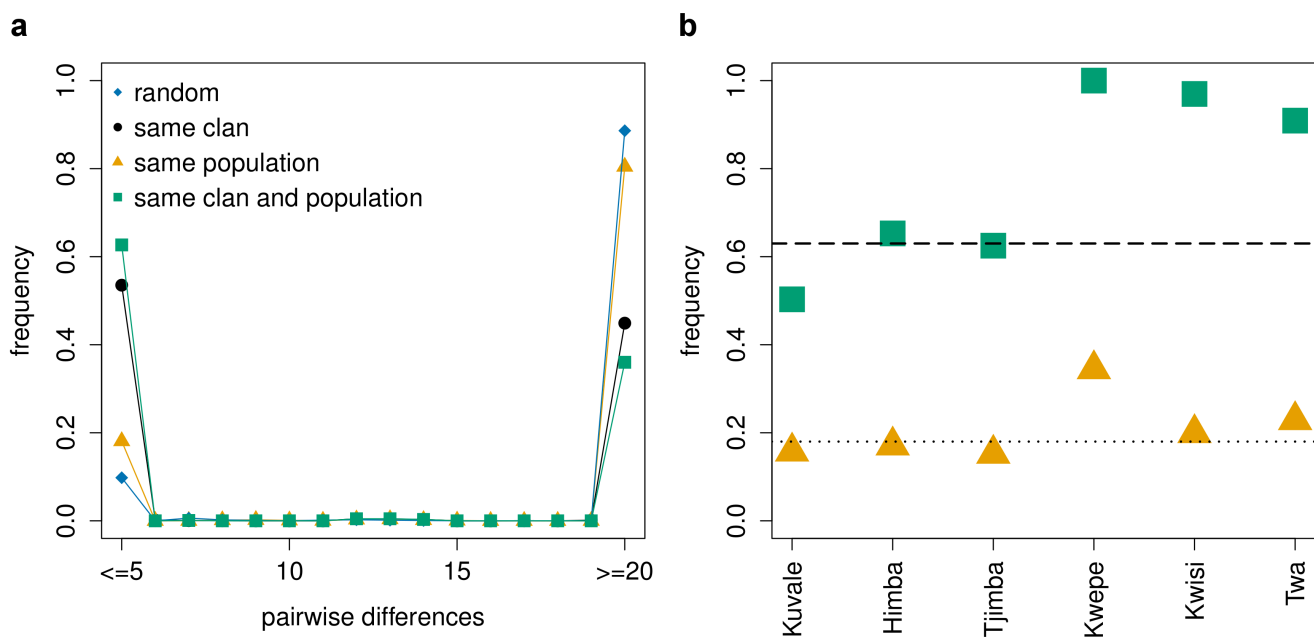

**Fig. 5** Genealogical consistency of matrilineal clans. (a) Distribution of pairwise differences obtained by randomly drawing pairs of sequences from: i) the whole Angolan Namib pool, ii) the same population, iii) the same clan, and iv) the same clan and population. (b) Sequence similarity in Angolan Namib populations computed for pairs of sequences randomly drawn from each population (orange triangles) and from individuals belonging to the same clan in each population (green squares). The dotted and dashed lines show the average sequence similarity computed within populations, regardless of the clan, and within clans, respectively. Sequence similarity was measured by the frequency of sequence pairs with  $\leq 5$  differences.

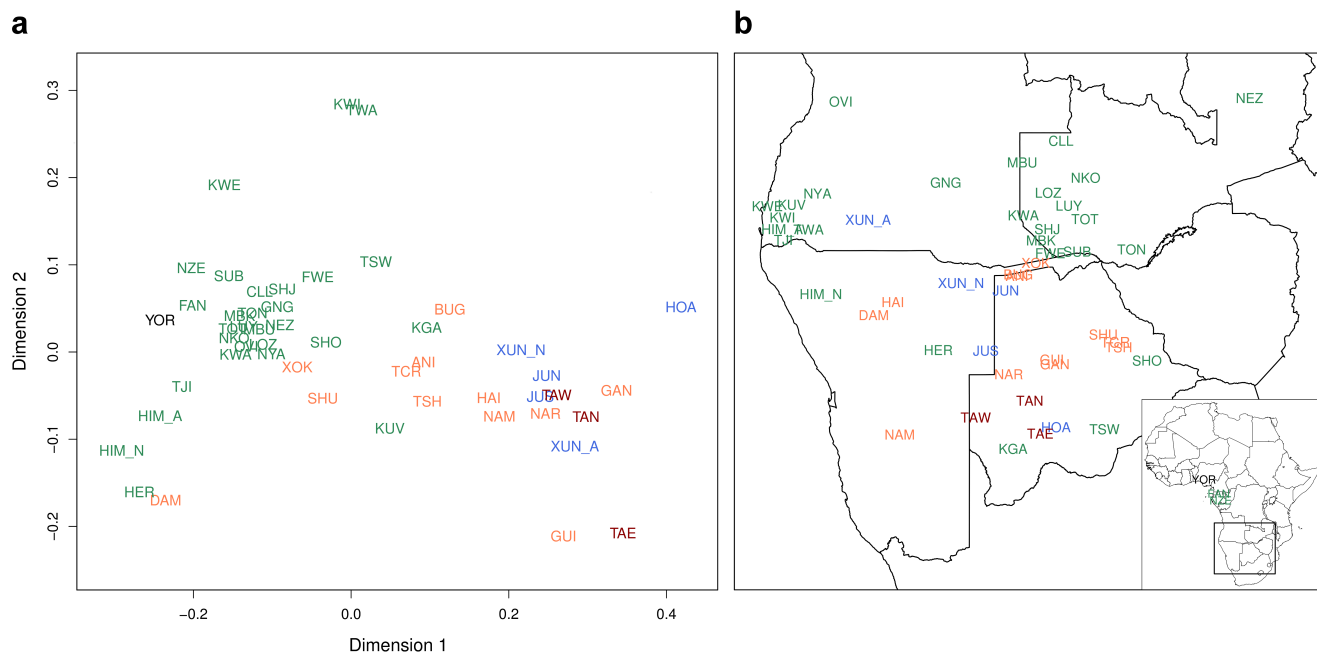

**Fig. 6** Multidimensional scaling analysis in the wider region of southern Africa. Colors correspond to language families: Niger-Congo non-Bantu (black), Niger-Congo Bantu (green), Kx'a (blue), Tuu (dark red), KhoeKwadi (orange). The code used for each population can be found in Table S2. (a) MDS plot based on  $\Phi_{st}$  genetic distances. Stress value: 9.4. (b) Geographic origin of the populations included in the MDS analysis.

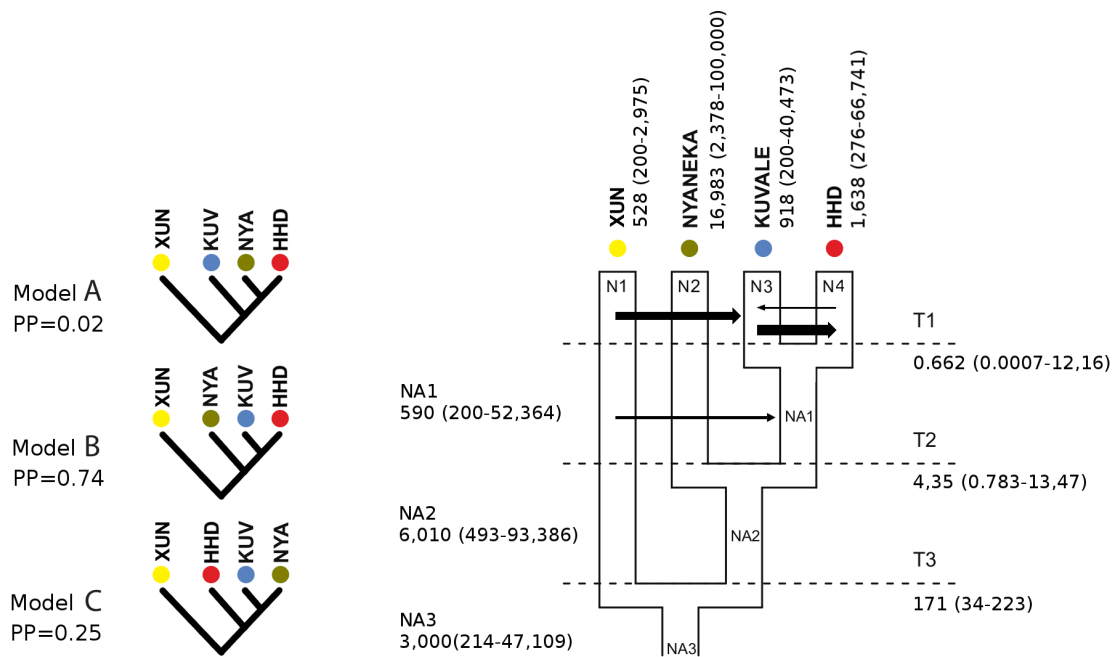

**Fig. 7** Demographic models tested by ABC. The three tested models are shown on the left with their respective posterior probabilities (PP). Migration ratios above 0.0001 or effective migration (Nm) above 2 are represented in the plot by arrows with width proportional to Nm. NA1- NA3: ancestral effective population sizes; N1 - N4: current effective population sizes; T1-T3: divergence times.

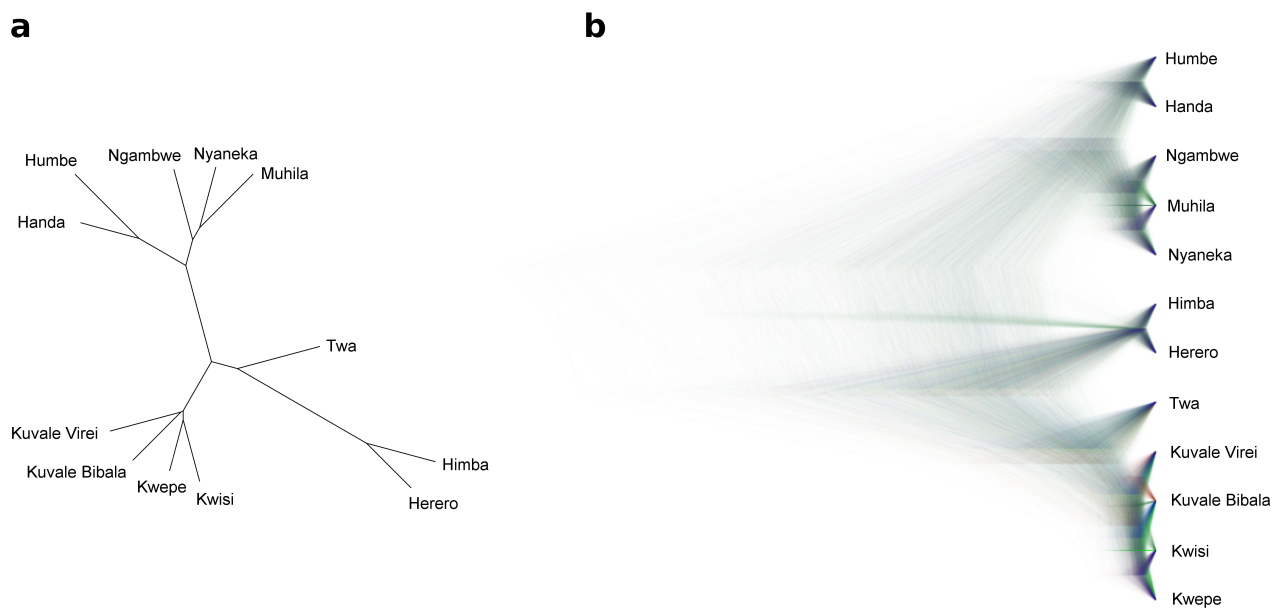

**Fig. 8** Linguistic relationships between Kuvale, Himba, Herero and Nyaneka-Nkhumbi. The Kuvale sample includes varieties spoken by the Kuvale people (Kuvale Virei and Kuvale Bibala), as well as the Kwepe, the Kwisi and the Twa. The Nyaneka-Nkhumbi sample includes varieties spoken by the Handa, Humbe, Ngambwe, Nyaneka and Muhila peoples. a) Neighbor-joining tree. b) Bayesian trees plotted with DensiTree.
